# Supplementary material for: Free Volatile Compounds of Veronica austriaca ssp. jacquinii (Baumg.) Eb. Fisch. and Their Biological Activity
Source: MDPI journal article supplement (doi:10.3390/plants10112529), 2021-11-20
Supplement: s1 [file s1]

**Table S1.** Chemical composition of the essential oil from four locations from aerial parts of *Veronica austriaca* ssp. *jacquinii* calculated based on the masses of EOs extracted from dry plant material.

| Component                          | Mr              |                 | St                                | Br                                | GJ                                |
|------------------------------------|-----------------|-----------------|-----------------------------------|-----------------------------------|-----------------------------------|
|                                    | RI <sup>1</sup> | RI <sup>2</sup> | EO ± SD (mg/g dry plant material) | EO ± SD (mg/g dry plant material) | EO ± SD (mg/g dry plant material) |
| <b>Sesquiterpene hydrocarbons</b>  |                 |                 | <b>0.056</b>                      | <b>0.358</b>                      | <b>0.143</b>                      |
| <i>E</i> -Caryophyllene*           | 1424            | 1585            | 0.012 ± 0.00038                   | 0.109 ± 0.00047                   | 0.078 ± 0.00051                   |
| δ-Cadinene                         | 1517            | 1745            | 0.044 ± 0.00038                   | 0.086 ± 0.00047                   | 0.051 ± 0.00103                   |
| <i>allo</i> -Aromadendrene         | 1465            | 1662            | -                                 | 0.041 ± 0.00047                   | -                                 |
| β-Chamigrene                       | 1476            | 1724            | -                                 | -                                 | 0.014 ± 0.00103                   |
| Germacrene D                       | 1482            | 1692            | -                                 | 0.122 ± 0.00233                   | -                                 |
| <b>Oxygenated sesquiterpenes</b>   |                 |                 | <b>2.014</b>                      | <b>1.443</b>                      | <b>1.505</b>                      |
| Spathulenol                        | 1577            | 2101            | -                                 | 0.086 ± 0.00047                   | 0.023 ± 0.00051                   |
| β-Caryophyllene oxide*             | 1581            | 1955            | 0.017 ± 0.00038                   | 0.029 ± 0.00047                   | 0.025 ± 0.00051                   |
| γ-Eudesmol                         | 1632            | 2175            | -                                 | 0.012 ± 0.0014                    | -                                 |
| α-Bisabolol oxide                  | 1748            | 2511            | -                                 | 0.017 ± 0.00047                   | -                                 |
| Hexahydrofarnesyl acetone          | 1839            | 2113            | 1.997 ± 0.00038                   | 1.299 ± 0.00047                   | 1.457 ± 0.00051                   |
| <b>Phenolic compounds</b>          |                 |                 | <b>0.024</b>                      | <b>0.125</b>                      | <b>0.043</b>                      |
| Methyl eugenol                     | 1403            | 2005            | -                                 | 0.0588 ± 0.00047                  | -                                 |
| ( <i>Z</i> )-Methyl isoeugenol     | 1451            | 2070            | 0.024 ± 0.00114                   | 0.066 ± 0.00047                   | 0.043 ± 0.00051                   |
| <b>Acids, alcohols and esters</b>  |                 |                 | <b>1.341</b>                      | <b>2.226</b>                      | <b>2.969</b>                      |
| 1-Hexadecanol                      | 1874            | 2371            | -                                 | 0.027 ± 0.0014                    | -                                 |
| Hexadecanoic acid                  | 1959            | 2912            | 1.015 ± 0.00076                   | 2.199 ± 0.000467                  | 2.804 ± 0.00257                   |
| Oleic acid                         | 2133            | 2998            | 0.089 ± 0.00038                   | -                                 | 0.026 ± 0.00154                   |
| Octadecanol acetate                | 2209            | 2211            | 0.237 ± 0.00038                   | -                                 | 0.116 ± 0.00051                   |
| 1-Heptatriacotanol                 | 2309            | 2309            | -                                 | -                                 | 0.023 ± 0.00051                   |
| <b>Hydrocarbons</b>                |                 |                 | <b>0.06114</b>                    | <b>0.095</b>                      | <b>0.129</b>                      |
| Eicosane*                          | 2000            | 2000            | -                                 | 0.054 ± 0.00047                   | 0.023 ± 0.00051                   |
| Heneicosane*                       | 2100            | 2100            | 0.02014 ± 0.00076                 | 0.016 ± 0.00047                   | -                                 |
| Docosane*                          | 2200            | 2200            | 0.014 ± 0.00038                   | 0.014 ± 0.00047                   | 0.042 ± 0.00051                   |
| Tricosane*                         | 2300            | 2300            | -                                 | -                                 | 0.032 ± 0.00051                   |
| Tetracosane*                       | 2400            | 2400            | -                                 | 0.011 ± 0.00047                   | 0.032 ± 0.00051                   |
| Pentacosane*                       | 2500            | 2500            | 0.027 ± 0.00152                   | -                                 | -                                 |
| <b>Total identification (mg/g)</b> |                 |                 | <b>3.496</b>                      | <b>4.247</b>                      | <b>4.789</b>                      |

Retention indices (RI) were determined relative to a series of *n*-alkanes (C8–C40) on capillary columns VF5-ms (RI<sup>1</sup>) [24] and CPWax 52 (RI<sup>2</sup>) [25]; Identification method: RI, comparison of RIs with those listed in a homemade library, reported in the literature [24], and/or authentic samples; comparison of mass spectra with those in mass spectral libraries NIST02 and Wiley 9; \* co-injection with reference compounds; SD, standard deviation.

**Table S2.** Chemical composition of the hydrosols from four locations from aerial parts of *Veronica austriaca* ssp. *jacquinii* calculated based on the masses of volatile compounds extracted from hydrosols from dry plant material

| Mr | St | Br | GJ |
|----|----|----|----|
|----|----|----|----|

| Component                               | RI <sup>1</sup> | RI <sup>2</sup> | Hy ± SD (mg/g<br>dry plant<br>material) |
|-----------------------------------------|-----------------|-----------------|-----------------------------------------|-----------------------------------------|-----------------------------------------|-----------------------------------------|
| <b>Monoterpene hydrocarbons</b>         |                 |                 | <b>0.047</b>                            | -                                       | -                                       | -                                       |
| α-Thujene                               | 924             | 1032            | 0.023 ± 0.00028                         | -                                       | -                                       | -                                       |
| β-Phellandrene                          | 1002            | 1194            | 0.024 ± 0.00083                         | -                                       | -                                       | -                                       |
| <b>Oxygenated monoterpenes</b>          |                 |                 | <b>0.585</b>                            | <b>0.708</b>                            | <b>0.238</b>                            | <b>0.679</b>                            |
| <i>trans</i> -Linalool oxide*           | 1088            | 1434            | 0.010 ± 0.00110                         | -                                       | -                                       | -                                       |
| <i>n</i> -Nonanal                       | 1100            | 1389            | 0.120 ± 0.00028                         | 0.118 ± 0.00042                         | -                                       | -                                       |
| Borneol                                 | 1176            | 1719            | 0.043 ± 0.00028                         | 0.021 ± 0.00042                         | -                                       | -                                       |
| Camphor                                 | 1151            | 1499            | 0.060 ± 0.00028                         | 0.039 ± 0.00042                         | -                                       | 0.160 ± 0.00045                         |
| Pinocarvone                             | 1160            | 1565            | 0.055 ± 0.00028                         | -                                       | -                                       | -                                       |
| <i>trans-p</i> -Mentha-1(7),8-dien-2-ol | 1187            | 1803            | 0.212 ± 0.00028                         | 0.220 ± 0.00042                         | 0.220 ± 0.00030                         | 0.288 ± 0.00090                         |
| Hexyl 2-methyl butanoate                | 1233            | 1425            | 0.035 ± 0.00028                         | 0.131 ± 0.00126                         | -                                       | 0.197 ± 0.00045                         |
| Menthyl acetate                         | 1294            | 1550            | 0.050 ± 0.00083                         | 0.179 ± 0.00042                         | 0.018 ± 0.00030                         | 0.034 ± 0.00271                         |
| <b>Sesquiterpene hydrocarbons</b>       |                 |                 | <b>0.189</b>                            | <b>0.155</b>                            | <b>0.047</b>                            | <b>0.300</b>                            |
| <i>E</i> -Caryophyllene*                | 1424            | 1585            | 0.073 ± 0.00028                         | 0.056 ± 0.00042                         | 0.019 ± 0.00059                         | 0.033 ± 0.00045                         |
| δ-Cadinene                              | 1517            | 1745            | 0.065 ± 0.00028                         | -                                       | 0.028 ± 0.00177                         | 0.108 ± 0.00362                         |
| <i>allo</i> -Aromadendrene              | 1465            | 1662            | 0.042 ± 0.00028                         | -                                       | -                                       | 0.056 ± 0.00045                         |
| β-Chamigrene                            | 1478            | 1724            | 0.009 ± 0.00028                         | -                                       | -                                       | -                                       |
| Germacrene D                            | 1482            | 1692            | -                                       | 0.099 ± 0.00042                         | -                                       | 0.103 ± 0.00045                         |
| <b>Oxygenated sesquiterpenes</b>        |                 |                 | <b>0.088</b>                            | <b>0.398</b>                            | <b>0.285</b>                            | <b>0.194</b>                            |
| Spathulenol                             | 1577            | 2101            | -                                       | -                                       | -                                       | 0.056 ± 0.00045                         |
| β-Caryophyllene oxide*                  | 1581            | 1955            | 0.060 ± 0.00028                         | 0.053 ± 0.00042                         | 0.033 ± 0.00030                         | 0.023 ± 0.00045                         |
| γ-Eudesmol                              | 1632            | 2175            | -                                       | -                                       | -                                       | -                                       |
| α-Muurolol                              | 1645            | 2181            | -                                       | 0.052 ± 0.00042                         | -                                       | -                                       |
| α-Cadinol                               | 1655            | 2208            | -                                       | 0.103 ± 0.00042                         | -                                       | -                                       |
| α-Bisabolol                             | 1685            | 2210            | 0.015 ± 0.00083                         | -                                       | 0.015 ± 0.00030                         | 0.060 ± 0.00045                         |
| α-Bisabolol oxide                       | 1748            | 2511            | -                                       | -                                       | 0.009 ± 0.00030                         | 0.023 ± 0.00045                         |
| Hexahydrofarnesyl acetone               | 1839            | 2113            | 0.013 ± 0.00028                         | 0.190 ± 0.00168                         | 0.228 ± 0.00059                         | 0.032 ± 0.00045                         |
| <b>Phenolic compounds</b>               |                 |                 | <b>1.197</b>                            | <b>1.582</b>                            | <b>1.854</b>                            | <b>2.243</b>                            |
| Thymol*                                 | 1289            | 2154            | 0.230 ± 0.00138                         | 0.397 ± 0.00084                         | 0.103 ± 0.00030                         | 0.189 ± 0.00045                         |
| Thymol acetate                          | 1349            | -               | 0.101 ± 0.00028                         | 0.095 ± 0.00042                         | -                                       | 0.110 ± 0.00136                         |
| Methyl eugenol                          | 1403            | 2005            | 0.834 ± 0.00055                         | 0.980 ± 0.00042                         | 1.713 ± 0.00030                         | 1.891 ± 0.00045                         |
| ( <i>Z</i> )-Methyl isoeugenol          | 1451            | 2070            | 0.032 ± 0.00028                         | 0.110 ± 0.00252                         | 0.038 ± 0.00030                         | 0.053 ± 0.00045                         |
| <b>Acids, alcohols and esters</b>       |                 |                 | <b>0.191</b>                            | <b>0.557</b>                            | <b>0.206</b>                            | <b>0.281</b>                            |
| 1-Hexadecanol                           | 1874            | 2371            | -                                       | -                                       | 0.072 ± 0.00030                         | -                                       |
| Hexadecanoic acid                       | 1959            | 2912            | 0.126 ± 0.00028                         | 0.264 ± 0.00084                         | 0.067 ± 0.00030                         | 0.085 ± 0.00045                         |
| Oleic acid                              | 2133            | 2998            | 0.008 ± 0.00028                         | 0.204 ± 0.00042                         | 0.014 ± 0.00030                         | 0.171 ± 0.00045                         |
| Octadecanol acetate                     | 2209            | -               | 0.042 ± 0.00028                         | 0.050 ± 0.00042                         | 0.017 ± 0.00059                         | 0.025 ± 0.00045                         |
| 1-Heptatriacotanol                      | 2309            | 2309            | 0.015 ± 0.00028                         | 0.039 ± 0.00042                         | 0.036 ± 0.00030                         | -                                       |
| <b>Hydrocarbons</b>                     |                 |                 | <b>0.279</b>                            | <b>0.380</b>                            | <b>0.114</b>                            | <b>0.461</b>                            |
| Eicosane*                               | 2000            | 2000            | 0.042 ± 0.00110                         | -                                       | 0.013 ± 0.00030                         | 0.062 ± 0.00045                         |

|                             |      |      |                 |                 |                 |                 |
|-----------------------------|------|------|-----------------|-----------------|-----------------|-----------------|
| Heneicosane*                | 2100 | 2100 | 0.020 ± 0.00028 | -               | 0.009 ± 0.00030 | 0.025 ± 0.00271 |
| Docosane*                   | 2200 | 2200 | 0.032 ± 0.00028 | -               | 0.011 ± 0.00030 | 0.054 ± 0.00045 |
| Tricosane*                  | 2300 | 2300 | 0.017 ± 0.00028 | 0.036 ± 0.00084 | -               | -               |
| Tetracosane*                | 2400 | 2400 | -               | 0.020 ± 0.00042 | 0.026 ± 0.00030 | 0.031 ± 0.00045 |
| Pentacosane*                | 2500 | 2500 | 0.018 ± 0.00028 | 0.010 ± 0.00042 | -               | -               |
| Hexacosane*                 | 2600 | 2600 | 0.070 ± 0.00028 | 0.129 ± 0.00042 | 0.029 ± 0.00059 | 0.038 ± 0.00136 |
| Heptacosane*                | 2700 | 2700 | 0.087 ± 0.00028 | 0.135 ± 0.00042 | 0.009 ± 0.00030 | 0.047 ± 0.00045 |
| Octacosane*                 | 2800 | 2800 | 0.025 ± 0.00028 | 0.171 ± 0.00042 | 0.017 ± 0.00059 | 0.179 ± 0.00045 |
| <b>Total identification</b> |      |      | <b>2.576</b>    | <b>3.670</b>    | <b>2.744</b>    | <b>4.158</b>    |
| <b>(mg/g)</b>               |      |      |                 |                 |                 |                 |

Retention indices (RI) were determined relative to a series of *n*-alkanes (C8–C40) on capillary columns VF5-ms (RI<sup>1</sup>) [24] and CPWax 52 (RI<sup>2</sup>) [25]; Identification method: RI, comparison of RIs with those listed in a homemade library, reported in the literature [24], and/or authentic samples; comparison of mass spectra with those in mass spectral libraries NIST02 and Wiley 9; \* co-injection with reference compounds; SD, standard deviation.

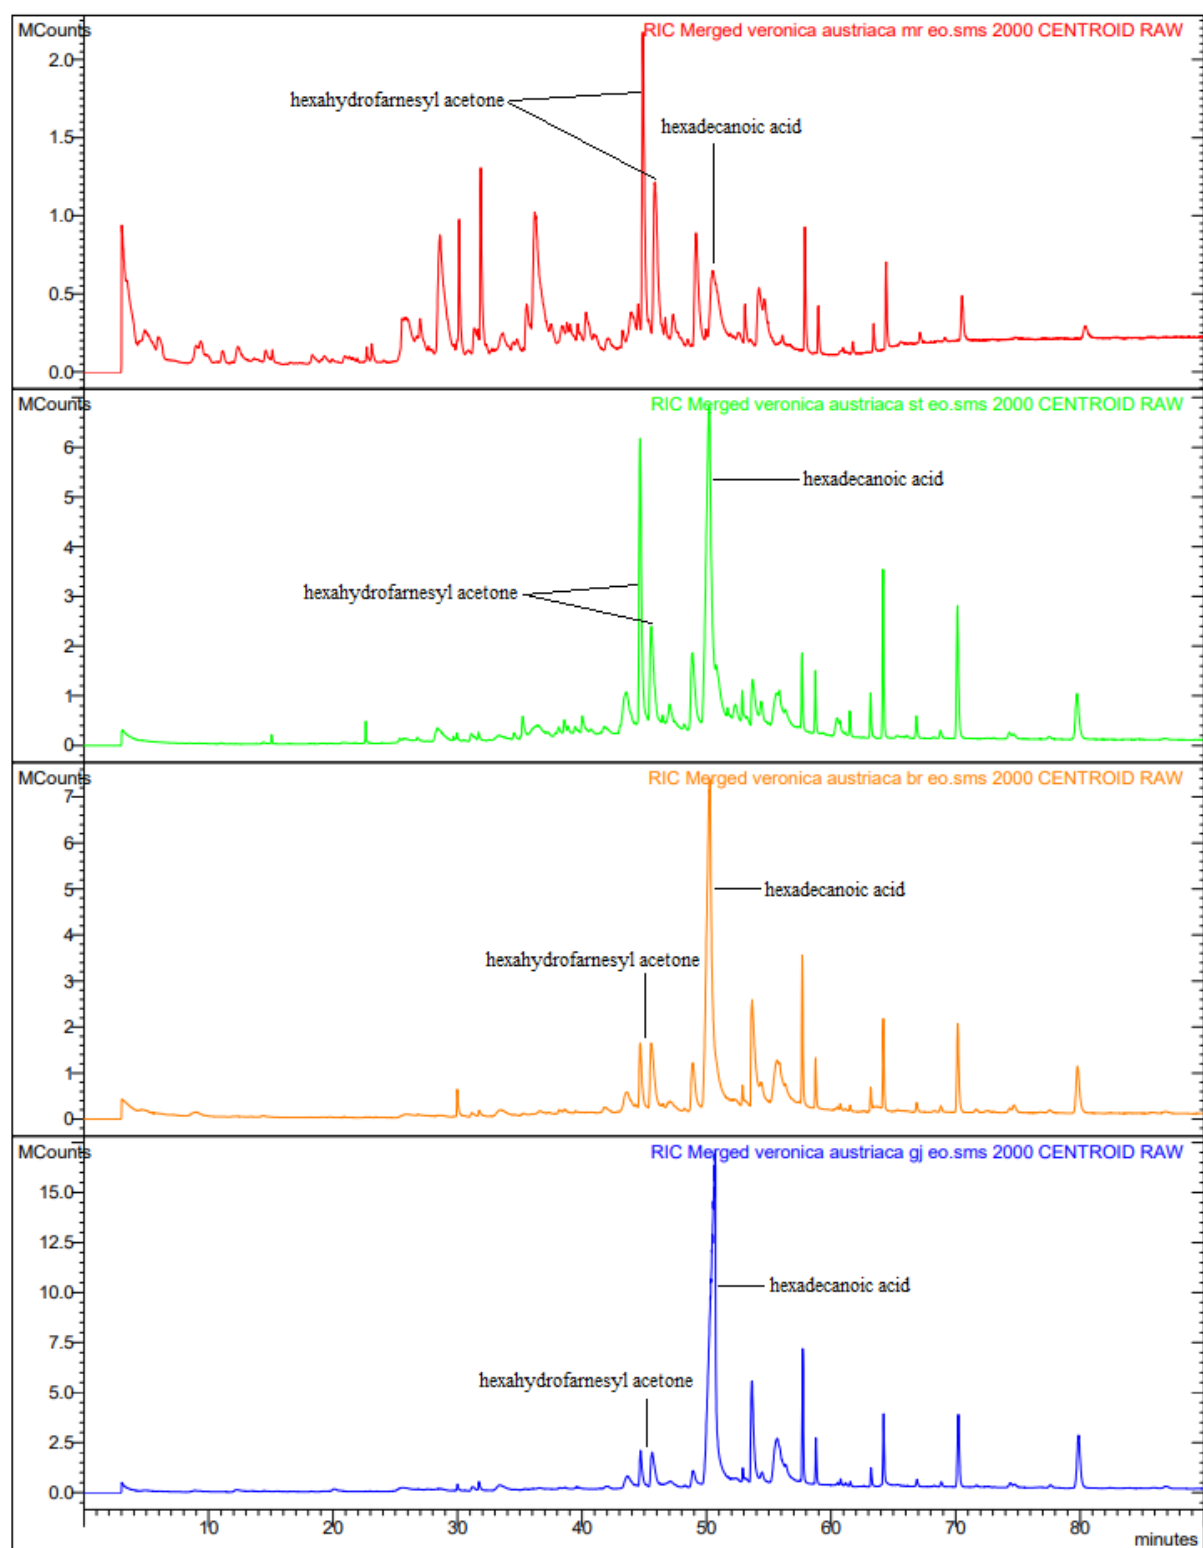

**Figure S1.** RIC chromatograms of the four samples of EOs of *V. jacquinii* with marked major compounds

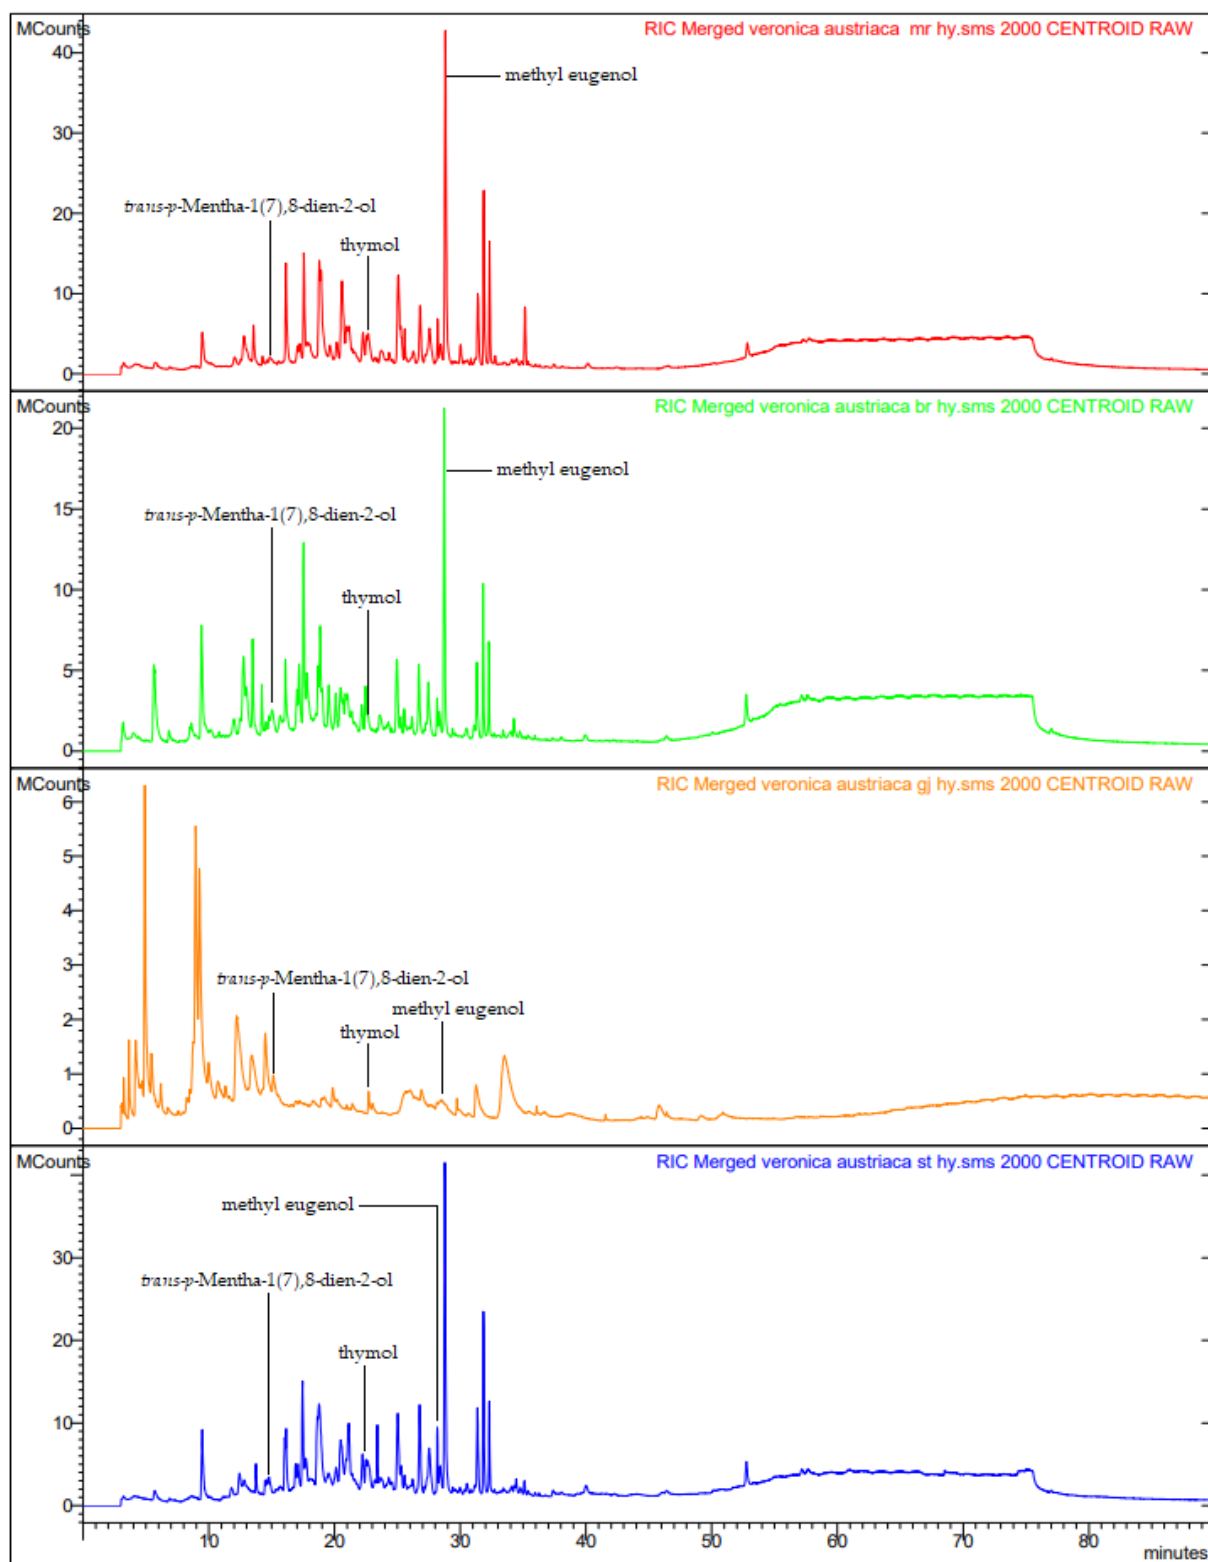

**Figure S2.** RIC chromatograms of the four samples of hydrosols of *V. jacquinii* with marked major compounds
